# Supplementary material for: Genetic architecture and candidate gene identification for grain size in bread wheat by GWAS
Source: Front Plant Sci. 2022 Nov 30;13:1072904. doi: 10.3389/fpls.2022.1072904 (PMC9748340; doi:10.3389/fpls.2022.1072904)
Supplement: Supplementary file 1 [file DataSheet_1.xlsx]

## Sheet: TableS1
Table S1. A characteristic summary of ten traits
Trait	Range	Mean ± s.d.	CV（%）	h2（%）
TGW（g）	23.08 - 60.95	43.77 ± 6.77	15.48	95.27
GA（mm2）	12.19 - 23.27	18.18 ± 1.75	9.63	94.01
GP（mm）	14.36 - 20.09	17.37 ± 0.84	4.83	93.69
LWR	1.60 - 2.67	1.93 ± 0.12	6.2	93.89
GL（mm）	5.44 - 7.89	6.62 ± 0.34	5.18	94.04
GW（mm）	2.65 - 3.94	3.46 ± 0.22	6.22	94.16
GD（mm）	3.93 - 5.43	4.79 ± 0.23	4.9	94.07
GR	0.38 - 0.63	0.52 ± 0.03	6.06	94.15
GPC（%）	11.93 - 18.44	14.33 ± 1.27	8.86	93.96
GSC（%）	73.65 - 81.57	78.77 ± 1.13	1.44	89.3

## Sheet: TableS2
Table S2. Expression profile of 29 candidate genes for qGL-2D.
Gene ID	Chinese spring		04chu122		Aikang58		04chu122-NIL1	04chu122-NIL2	Aikang58-NIL1	Aikang58-NIL2	Aikang58-NIL3	Description
	TPM-1	TPM-2	TPM-1	TPM-2	TPM-1	TPM-2	TPM	TPM	TPM	TPM	TPM
TraesCS2D02G407600	6.31	3.14	2.62	1.15	6.15	0.74	1.39	4.65	2.39	6.23	12.86	Glycosyl transferase
TraesCS2D02G407700	77.06	63.63	60.25	33.02	121.22	100.64	57.9	90.63	70.86	81.31	100.07	Glutathione
TraesCS2D02G407800	6.21	5.68	0	0.6	7.03	7.43	5.39	4.06	8.69	5.87	2.53	Copper-transporting
TraesCS2D02G408200	7.95	7.67	1.86	3.49	8.07	4.24	6.35	7.41	5.28	4.91	3.4	BEACH domain-containing protein
TraesCS2D02G408300	3.6	4.41	4.9	3.12	6	4.75	2.75	2.18	3.83	3.29	4.08	Cs At PR5
TraesCS2D02G408400	3.89	4.61	3.96	3.42	8.96	2.98	2.82	4.8	2.94	3.84	2.66	Cs At PR5
TraesCS2D02G408900	33.53	25.22	11.15	10.64	28.35	3.28	1.76	8.13	11.89	21.07	11.26	14 kDa proline-rich protein
TraesCS2D02G410100	4.02	3.28	2.27	2.65	4.23	2.57	3.25	2.51	3.42	3.02	2.81	WD40 repeat-containing protein
TraesCS2D02G411600	8.98	8.24	9.48	9.65	11.83	11.11	16.05	9.79	10.43	9.07	5.25	Cysteine and histidine-rich domain-containing protein RAR1
TraesCS2D02G412000	4.75	3.03	1.77	2.29	5.82	1.82	0.99	3.09	1.83	4.99	4.32	Acetylglutamate kinase-like protein
TraesCS2D02G412200	8.42	5.81	5.53	3.94	3.88	9.11	4.75	4.72	16.71	9.69	1.29	ethylene-responsive transcription factor
TraesCS2D02G412600	6.79	4.42	4.21	5.75	6.67	4.93	6.79	4.94	7.5	6.51	3.64	Isoaspartyl peptidase/L-asparaginase
TraesCS2D02G412800	4.78	3.29	4.88	3.08	4.01	3.59	2.15	6.76	4.05	4.44	5.38	L-allo-threonine aldolase
TraesCS2D02G413100	4.07	2.61	2.15	1.42	6.89	1.53	1.26	1.4	2.19	6.38	2	Histone H4
TraesCS2D02G413500	3.69	0.19	1.45	2.65	6.6	3.54	3.49	5.35	2.7	3.54	4.44	U3 small nucleolar RNA-associated protein 10
TraesCS2D02G413700	5.47	1.38	3.82	3.98	8.28	8.56	5.43	6.48	6.28	6.92	6.58	PPPDE thiol peptidase family protein
TraesCS2D02G414800	378.14	334.57	671.5	438.99	471.84	524.26	443.5	406.3	702.16	487.42	1005.1	Oleosin
TraesCS2D02G414900	33.05	19.76	0.21	-	16	0.34	5.19	12.31	6.23	28.61	9.72	Histone H4
TraesCS2D02G415100	4.65	3.11	2.76	3.55	12.81	4.88	4.89	5.94	3.63	5.88	2.89	Smr domain-containing protein
TraesCS2D02G416200	6.75	1.23	4.6	3.28	11.49	7.76	3.93	8.34	7.79	6.9	4.72	PH-response transcription factor pac C/RIM101 isoform 2
TraesCS2D02G417000	10.53	0.49	5.49	3.49	11.52	9.49	7.08	11.99	8.58	10.44	4.06	Argonaute family protein
TraesCS2D02G417100	0.54	2.43	4.56	5.33	0	2.74	6.14	0.82	2.71	1.71	29.56	Calcium-binding EF-hand family protein
TraesCS2D02G417700	6	6.84	3.99	4.52	25.15	5.06	1.38	3.27	3.02	6.6	0.77	cysteine-rich/transmembrane domain A-like protein
TraesCS2D02G417800	4.7	3.78	4.33	3.57	10.58	6.26	5.43	5.21	5.23	5.71	15.93	Lecithin:cholesterol acyltransferase
TraesCS2D02G417900	5.26	3.26	4.98	4.54	12.93	6.84	3.8	7.07	5.61	5.05	3.01	Elongation factor G
TraesCS2D02G418200	8.82	8.66	4.72	7.95	16.54	13.93	10.8	10.52	10.25	8.44	8.68	Myosin heavy chain-like protein
TraesCS2D02G418400	9.8	8.8	11.26	9.09	13.66	14.4	8.56	13.02	9.84	13	21.89	Aminotransferase
TraesCS2D02G418900	11.01	9.55	7.94	8.12	15.58	8.41	8.4	11.33	11.2	11.47	13.24	Dehydrogenase
TraesCS2D02G419000	8.67	9.35	8.56	9.05	13.76	14.1	16.51	11.69	0.13	11.12	11.02	Potassium transporter
